# Supplementary material for: Agarose-gel coating for improving the polydopamine-based pH sensor stability in continuous pH measurements
Source: Royal Society of Chemistry journal article supplement (doi:10.1039/d4sd00294f), 2024-12-11
Supplement: d4sd00294f1.pdf [file d4sd00294f1.pdf]

## Electronic Supplementary Information

### **Agarose-gel coating for improving the polydopamine-based pH sensor stability in continuous pH measurements**

*Natalie Fudge<sup>1†</sup>, Joshua Khatri<sup>1†</sup>, Fatemeh Keyvani<sup>1</sup>, Mahla Poudineh<sup>1</sup> \**

<sup>1</sup>Department of Electrical and Computer Engineering, Faculty of Engineering, University of Waterloo, Waterloo, ON N2L 3G1, Canada

\*Correspondence to [mahla.poudineh@uwaterloo.ca](mailto:mahla.poudineh@uwaterloo.ca)

†Authors contributed equally to the paper.

Keywords: pH sensing, continuous monitoring, electrochemical, polydopamine, hydrogel, agarose

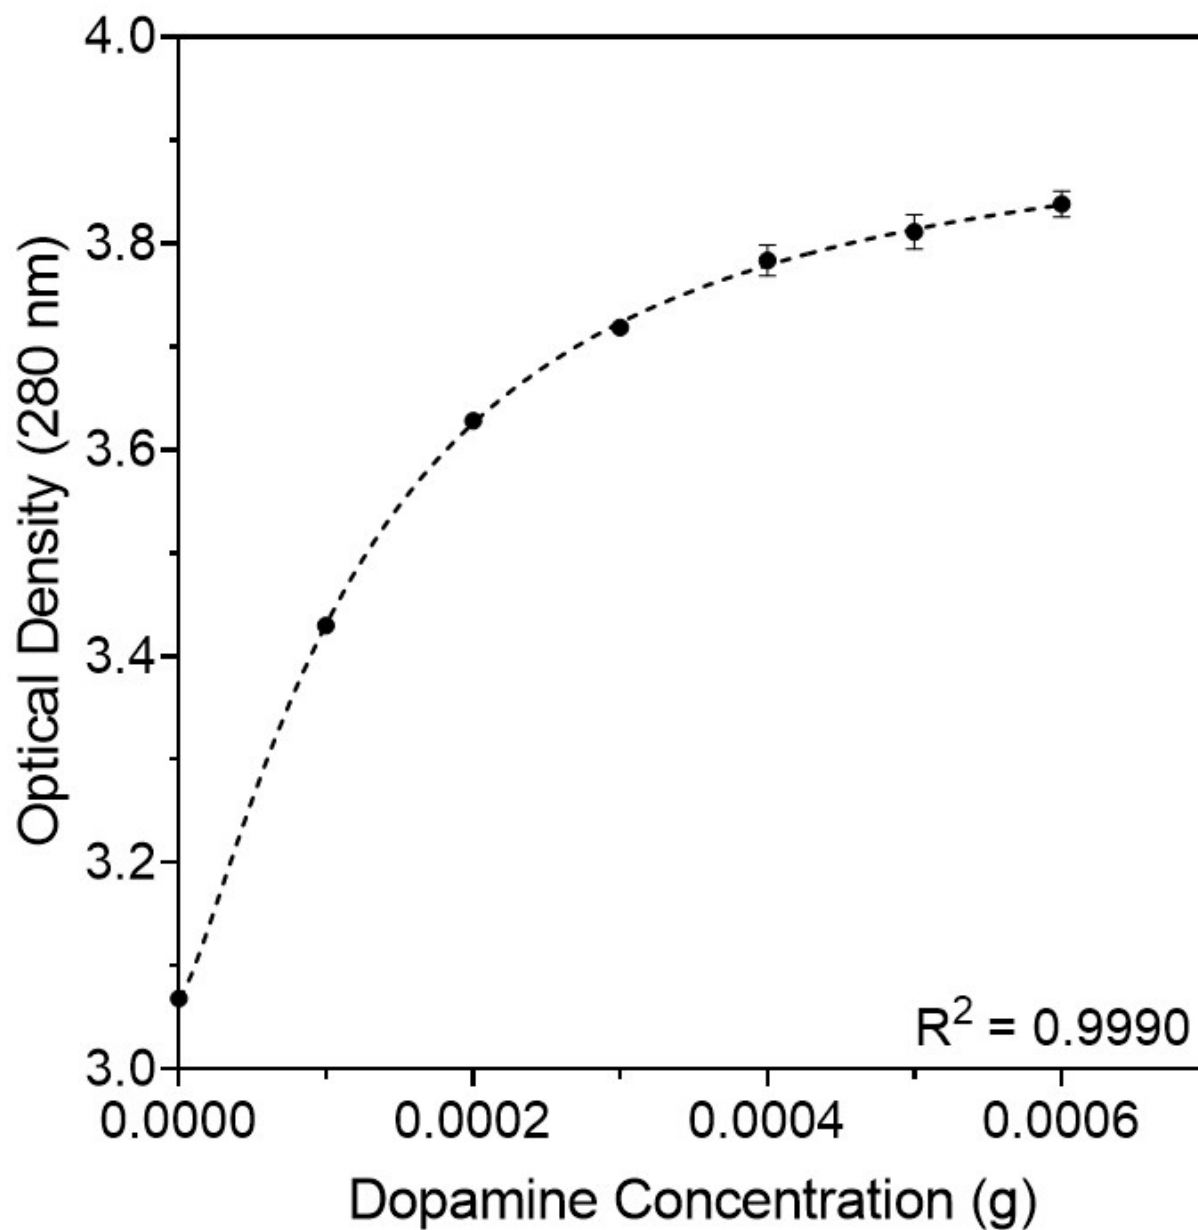

**Fig S1.** Calibration curve correlating the optical density at 280nm and dopamine concentration in 1X PBS at pH 7.3 ( $R^2 = 0.999$ ,  $n = 2$ ). Error bars represent the STD. The optical densities of dopamine from left to right are  $3.838 \pm 0.013$ ,  $3.811 \pm 0.017$ ,  $3.784 \pm 0.015$ ,  $3.719 \pm 0.004$ ,  $3.628 \pm 0.006$ ,  $3.430 \pm 0.003$ , and  $3.069 \pm 0.008$ .

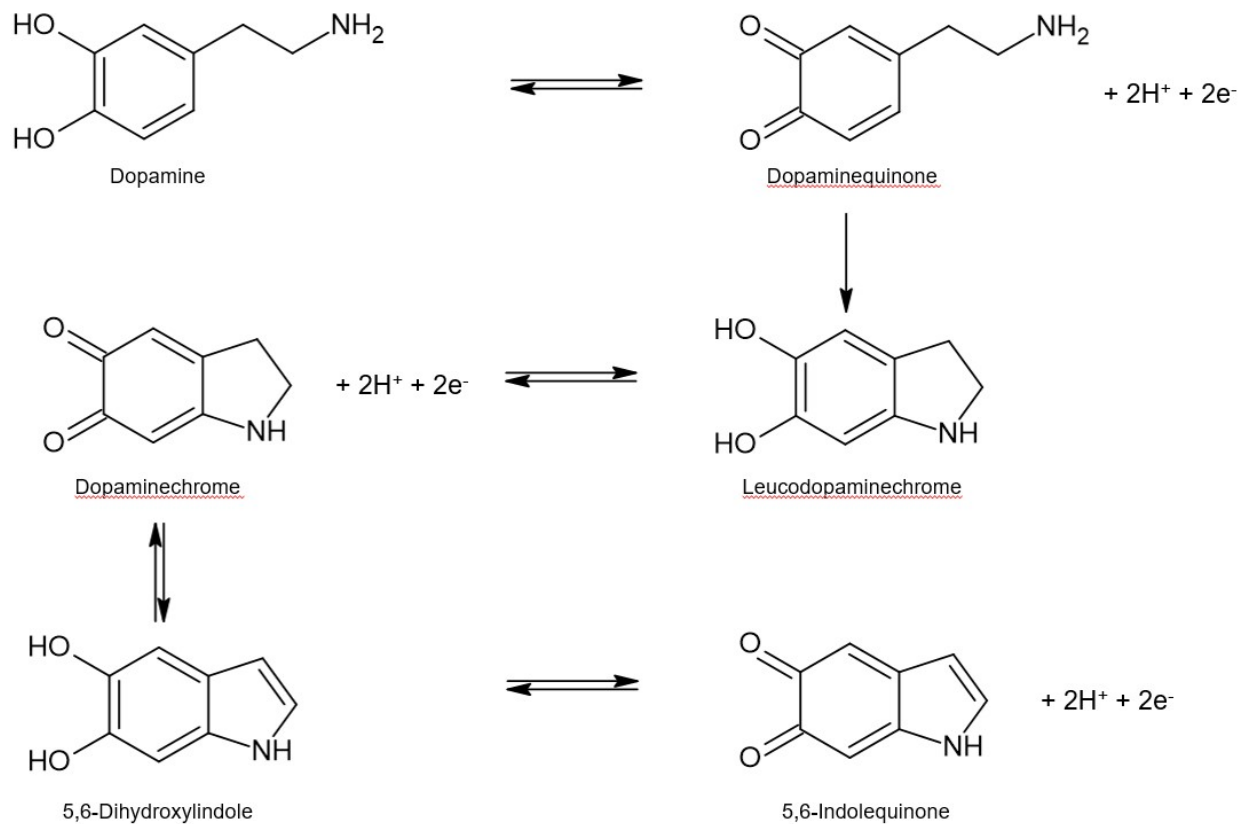

**Scheme S1.** Schematic of the polymerization of dopamine into polydopamine (PDA).

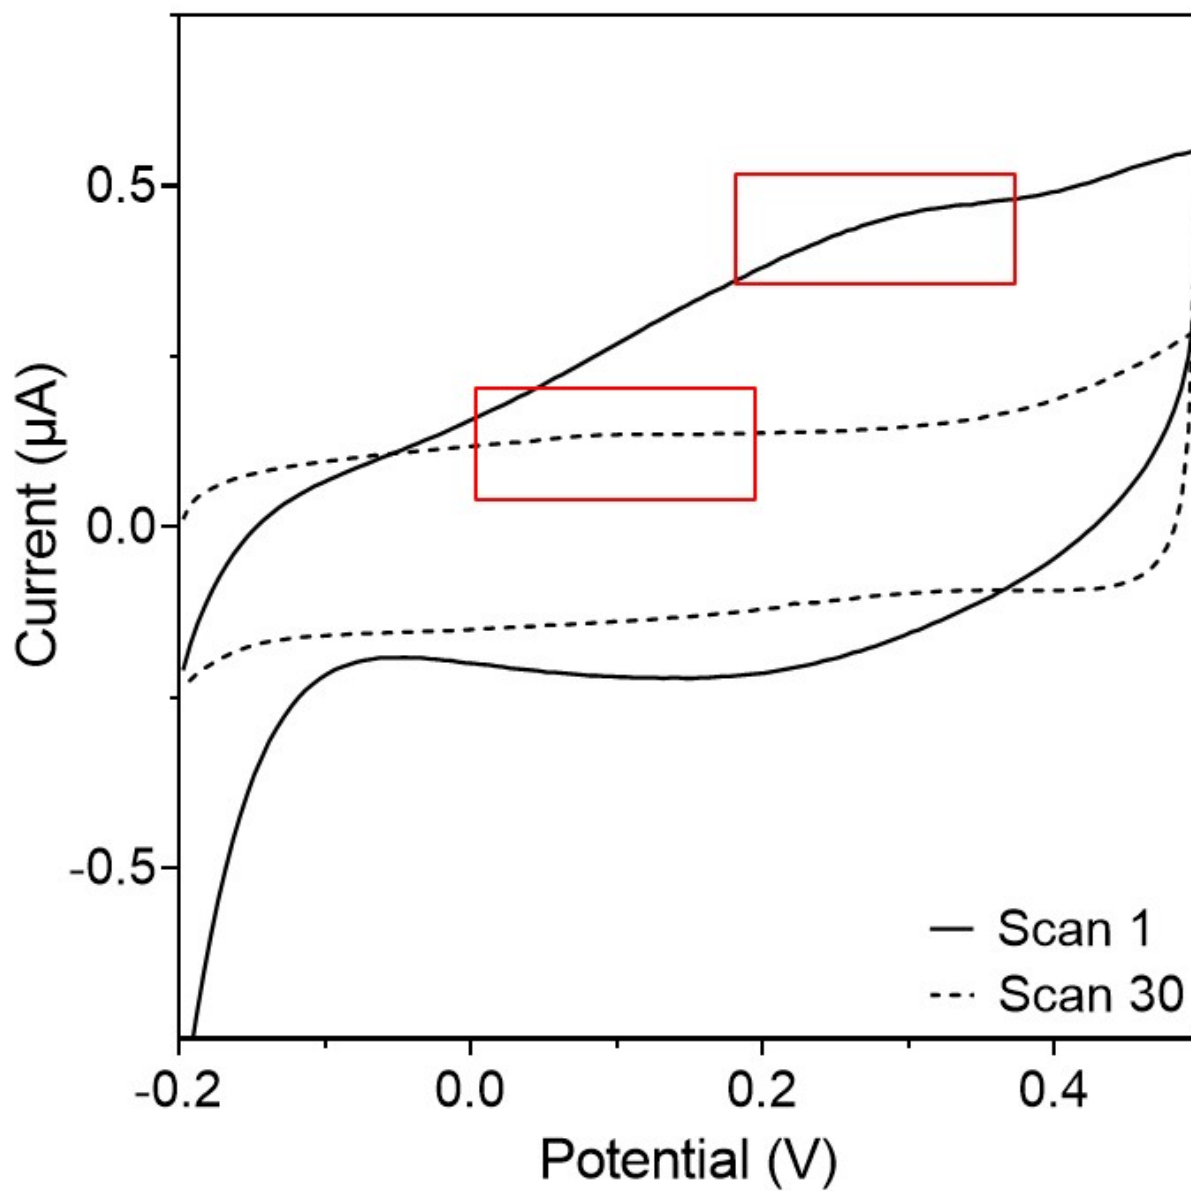

**Fig S2.** Comparing the initial and final CV measurements of the stability testing of the heat-treated pH sensors.

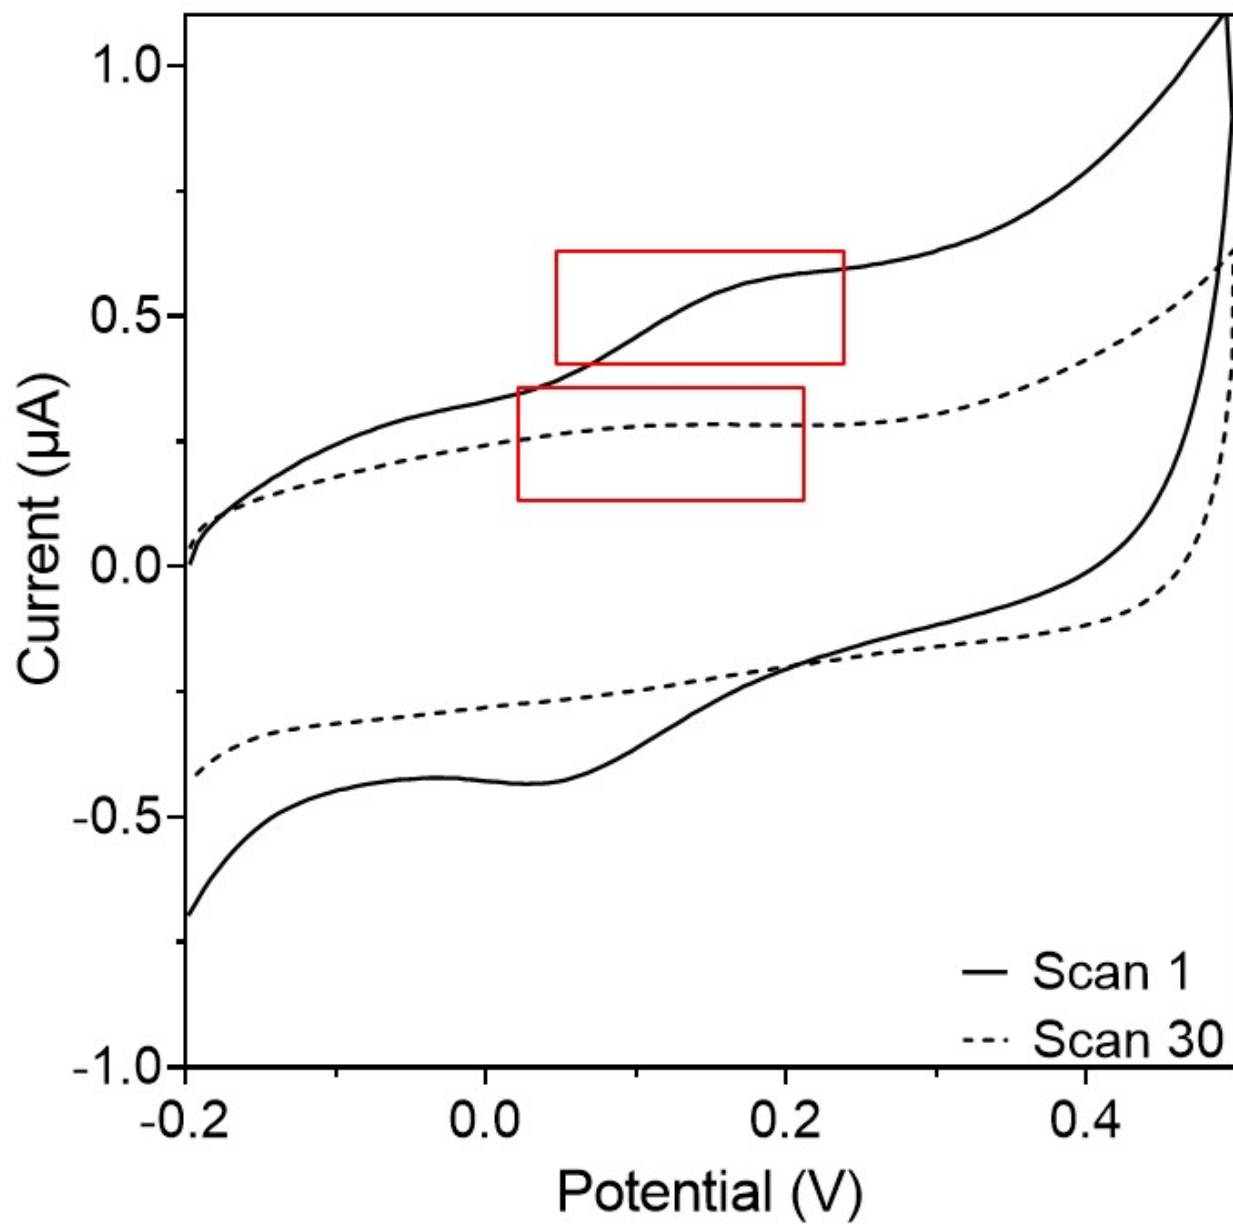

**Fig S3.** Comparing the initial and final CV measurements of the stability testing of the agarose-coated pH sensors.

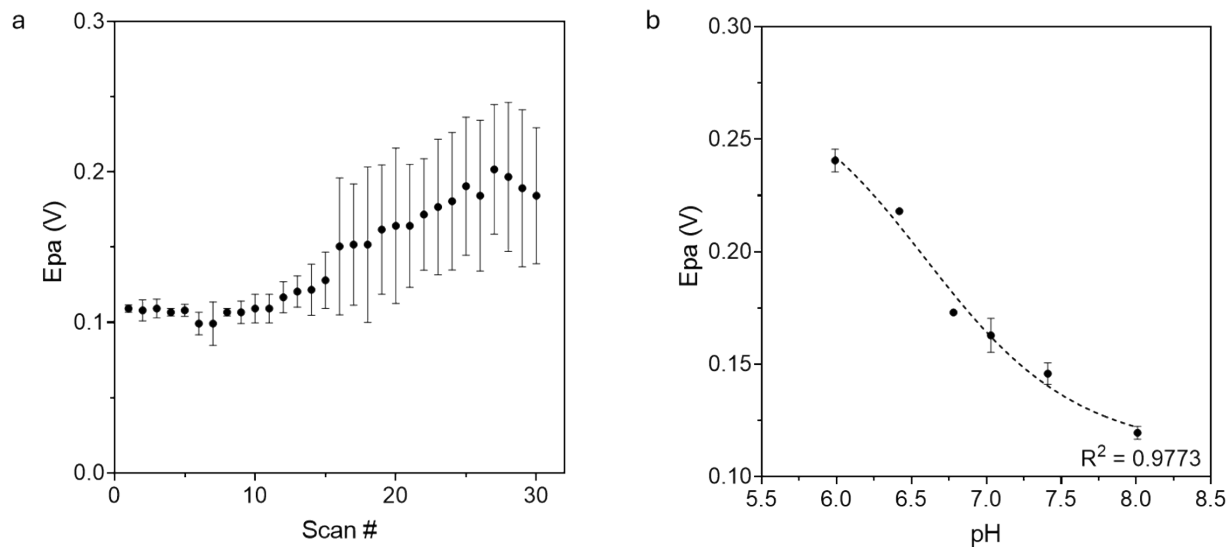

**Fig S4.** Stability testing the baseline PDA pH sensor in complex biological fluid. (a) Oxidation potentials of pH sensors ( $n=4$ ) over 30 scans in simulated wound fluid exudate (WFE) at pH 7.32. (b) Calibration curve of pH sensors ( $n = 4$ ) tested in WFE with varying pH ( $R^2 = 0.98$ , sensitivity = slope of the linear region  $[6.0 - 7.0] = -0.08$ ). Error bars represent the STD.

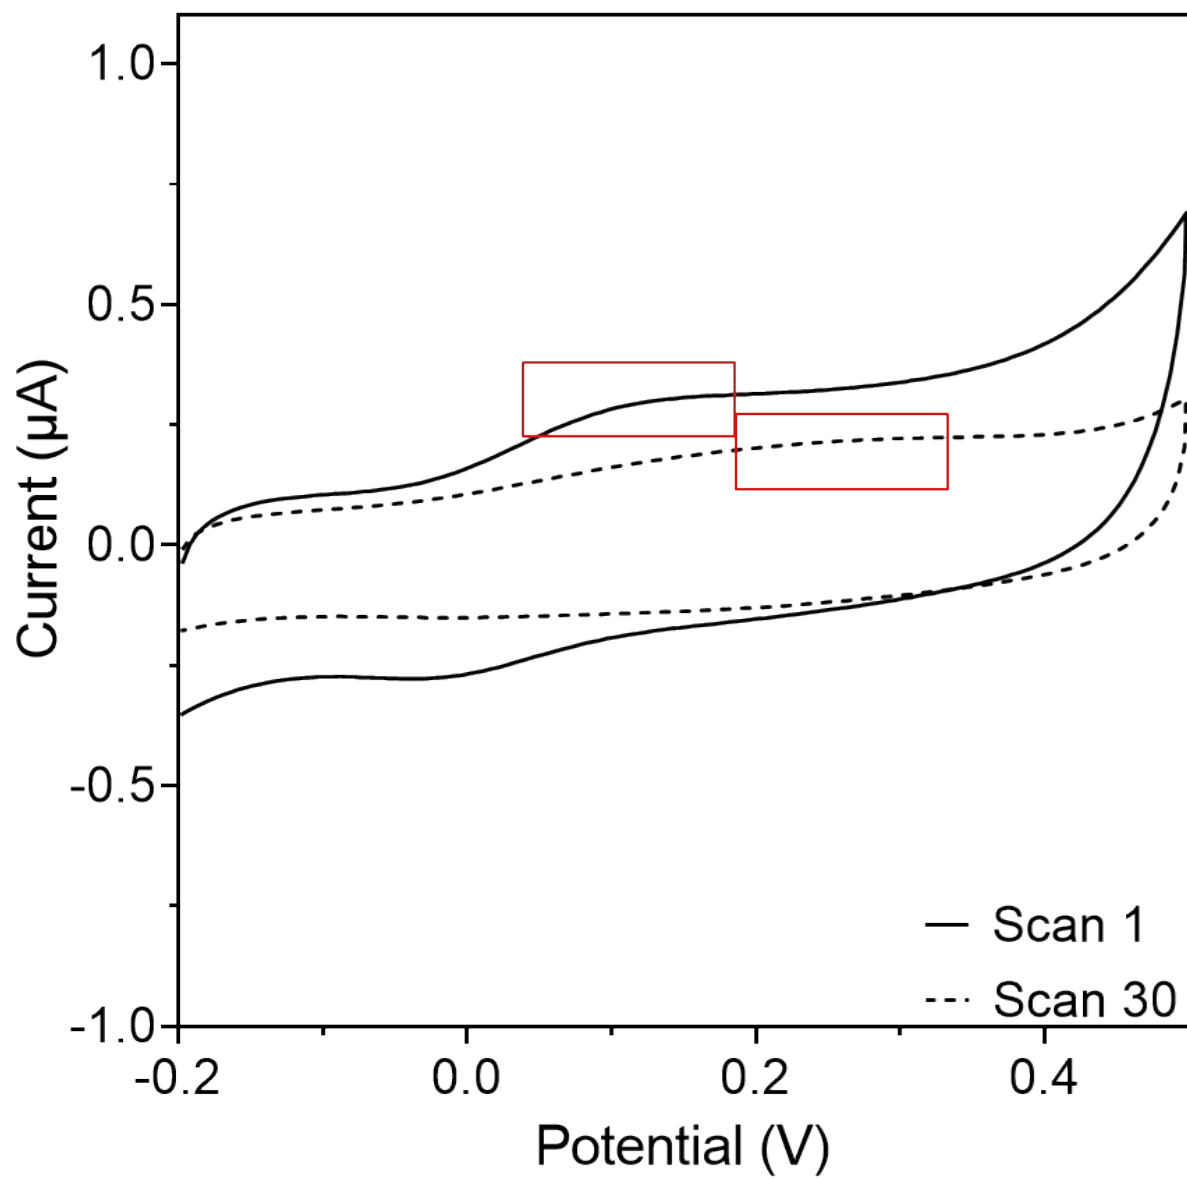

**Fig S5.** Comparing the initial and final CV measurements of the stability testing of the baseline PDA pH sensors in WFE.

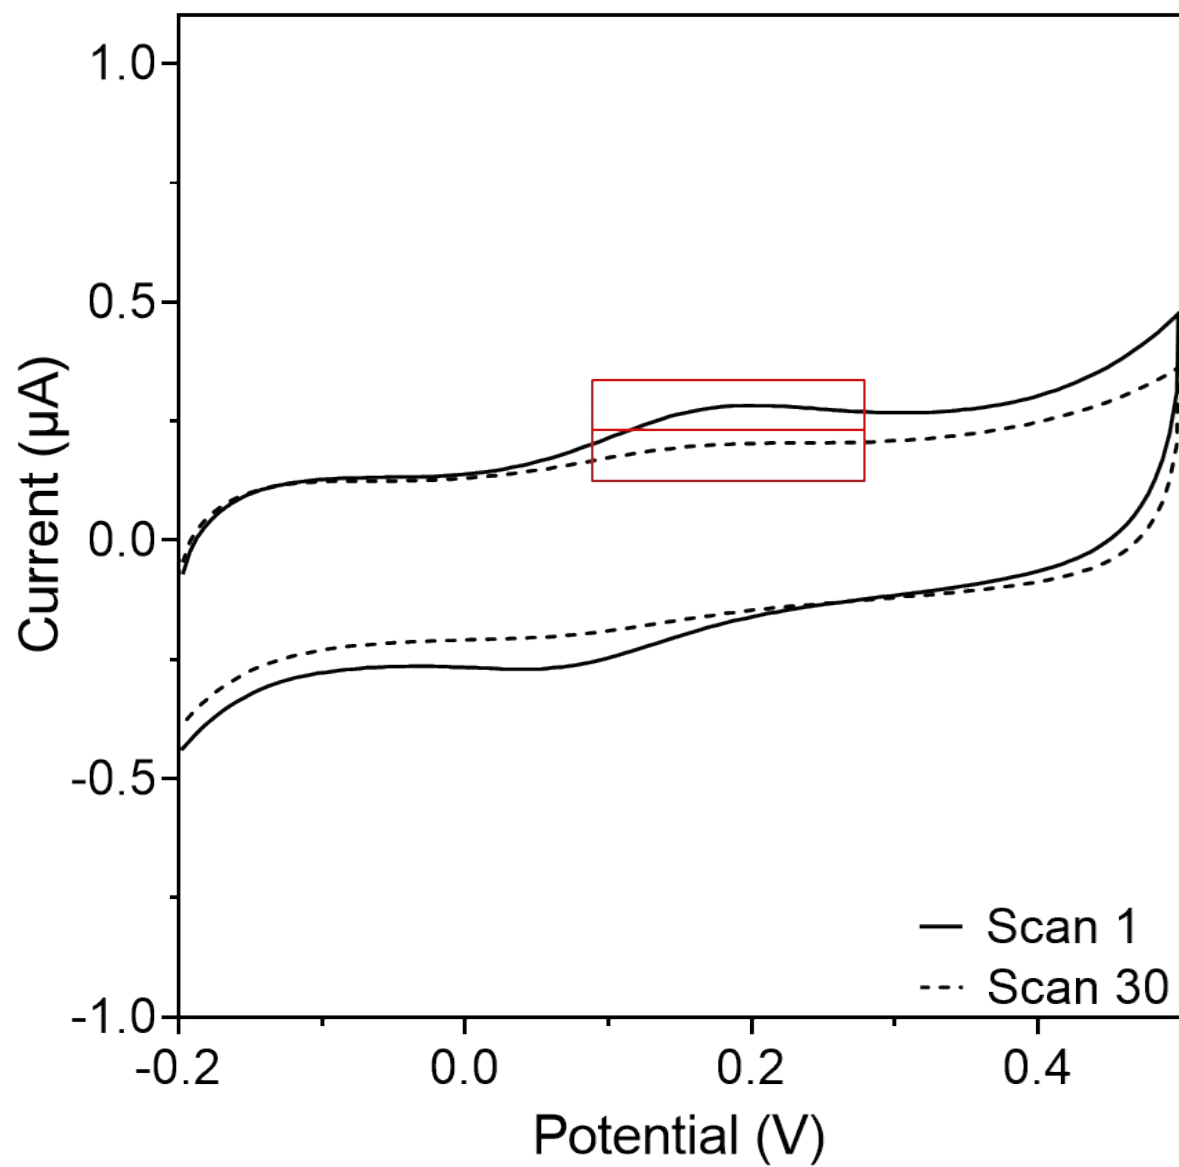

**Fig S6.** Comparing the initial and final CV measurements of the stability testing of the agarose-coated pH sensors in WFE.
